# Supplementary material
Source: PubMed Central journal article supplement (PMC6441697)

**SUPPLEMENTAL APPENDIX**

**Comparison of Care Patterns and Rehospitalizations for Mechanically Ventilated Patients in New York and Ontario**

Hannah Wunsch, MD MSc, Andrea D Hill, Damon C. Scales, Robert A. Fowler, May Hua

**Table E1. Definitions of US International Classification of Disease (ICD-9-CM) and Canadian Classification of Health Interventions (CCI) codes for mechanical ventilation**

|                       |                                                                                                                                                                                                                                                                                                                             |
|-----------------------|-----------------------------------------------------------------------------------------------------------------------------------------------------------------------------------------------------------------------------------------------------------------------------------------------------------------------------|
| <b>ICD-9-CM codes</b> |                                                                                                                                                                                                                                                                                                                             |
| <b>96.70</b>          | Continuous invasive mechanical ventilation of unspecified duration                                                                                                                                                                                                                                                          |
| <b>96.71</b>          | Continuous invasive mechanical ventilation for less than 96 consecutive hours                                                                                                                                                                                                                                               |
| <b>96.72</b>          | Continuous invasive mechanical ventilation for 96 consecutive hours or more                                                                                                                                                                                                                                                 |
|                       |                                                                                                                                                                                                                                                                                                                             |
| <b>CCI codes</b>      |                                                                                                                                                                                                                                                                                                                             |
| <b>1.GZ.31</b>        | Ventilation, respiratory system                                                                                                                                                                                                                                                                                             |
| <b>.CA-ND</b>         | Invasive per orifice approach by endotracheal intubation. Includes: Controlled/assisted mechanical ventilation (CMV, AMV, IPPV); High frequency ventilation (HFV); Intermittent mandatory ventilation (IMV, SIMV); Inverse ratio ventilation (IRV); Pressure support/ control ventilation (PSV, PCV)                        |
| <b>.CA-EP</b>         | Invasive per orifice approach by endotracheal intubation. Includes bag-valve connected to endotracheal tube for ventilation                                                                                                                                                                                                 |
| <b>.CR-ND</b>         | Invasive per orifice with incision approach for intubation through tracheostomy. Includes: Controlled/assisted mechanical ventilation (CMV, AMV, IPPV); High frequency ventilation (HFV); Intermittent mandatory ventilation (IMV, SIMV); Inverse ratio ventilation (IRV); Pressure support/ control ventilation (PSV, PCV) |
| <b>.GP-ND</b>         | Invasive percutaneous transluminal approach (e.g. transtracheal jet) through needle. Includes: High frequency ventilation [HFV] via transtracheal jet                                                                                                                                                                       |

**Table E2. Prevalence of Charlson-Deyo Comorbidities Among Mechanically Ventilated Patients Rehospitalized within 30 days in New York and Ontario**

| Individual Comorbidity, %             | New York – 30 day rehospitalizations |                        | Ontario – 30 day rehospitalizations |                       |
|---------------------------------------|--------------------------------------|------------------------|-------------------------------------|-----------------------|
|                                       | None (n=55,536)                      | One or More (n=15,527) | None (n=36,295)                     | One or More (n=5,580) |
| Cerebrovascular Disease               | 8.4                                  | 8.4                    | 9.7                                 | 10.1                  |
| Chronic Obstructive Pulmonary Disease | 27.6                                 | 30.4                   | 15.3                                | 20.9                  |
| Congestive Heart Failure              | 22.4                                 | 30.6                   | 15.5                                | 24.0                  |
| Connective tissue / rheumatic disease | 1.8                                  | 1.9                    | 1.5                                 | 2.5                   |
| Dementia                              | 0.9                                  | 1.3                    | 2.6                                 | 3.3                   |
| Diabetes with complications           | 2.8                                  | 4.4                    | 21.5                                | 28.0                  |
| Diabetes without complications        | 20.4                                 | 23.1                   | 6.9                                 | 7.4                   |
| Hemiplegia or Paraplegia              | 3.4                                  | 3.2                    | 3.4                                 | 3.3                   |
| HIV/AIDS                              | -                                    | -                      | -                                   | -                     |
| Liver Disease, any                    | 2.4                                  | 3.0                    | 2.2                                 | 2.5                   |
| Liver Disease, moderate or severe     | 1.8                                  | 2.4                    | 2.2                                 | 4.2                   |
| Metastatic Cancer                     | 3.3                                  | 4.8                    | 3.7                                 | 6.1                   |
| Myocardial Infarction                 | 8.2                                  | 9.2                    | 18.1                                | 21.9                  |
| Peptic Ulcer Disease                  | 2.2                                  | 2.5                    | 4.1                                 | 5.3                   |
| Peripheral Vascular Disease           | 4.4                                  | 5.6                    | 8.6                                 | 10.7                  |
| Primary Cancer                        | 8.2                                  | 11.7                   | 9.6                                 | 13.4                  |
| Renal Disease                         | 13.2                                 | 21.1                   | 6.3                                 | 11.7                  |

**Table E3. Data on rehospitalizations stratified by Insurance status and Race (NY data only)**

|                     | <b>No<br/>rehospitalization<br/>(n=55,536)</b> | <b>One or more<br/>rehospitalizations<br/>(n=15,527)</b> |
|---------------------|------------------------------------------------|----------------------------------------------------------|
| <b>Insurance, %</b> |                                                |                                                          |
| <b>Medicare</b>     | 73.4                                           | 26.7                                                     |
| <b>Medicaid</b>     | 80.2                                           | 19.8                                                     |
| <b>Private</b>      | 82.2                                           | 17.8                                                     |
| <b>Self-Pay</b>     | 86.8                                           | 13.2                                                     |
| <b>Other*</b>       | 87.6                                           | 12.4                                                     |
| <b>Race†, %</b>     |                                                |                                                          |
| <b>White</b>        | 78.6                                           | 21.4                                                     |
| <b>Black</b>        | 77.2                                           | 22.8                                                     |
| <b>Hispanic</b>     | 77.9                                           | 22.1                                                     |
| <b>Asian</b>        | 75.5                                           | 24.5                                                     |
| <b>Other</b>        | 77.9                                           | 22.1                                                     |

\*Other insurance category includes CHAMPUS (Civilian Health and Medical Program of the Uniformed Services), the Veterans' Affairs Plan, other federal and non-federal insurance programs, workers' compensation and automobile medical claims.

†Other race category includes Native American (0.3%), Native Hawaiian or Pacific Islander (0.1%) and unknown/declined (15.6%).

**Table E4. Factors Associated with Increased Risk for 30 day Rehospitalization for Mechanically Ventilated patients in New York and Ontario\***

|                                                 | New York – 30-day rehospitalizations |                          |         | Ontario – 30-day rehospitalizations |                          |         |
|-------------------------------------------------|--------------------------------------|--------------------------|---------|-------------------------------------|--------------------------|---------|
|                                                 | n (%)<br>(71,063)                    | Hazard Ratio (95%<br>CI) | P value | n (%)<br>(n=41,875)                 | Hazard Ratio (95%<br>CI) | P value |
| <b>Age</b>                                      |                                      |                          |         |                                     |                          |         |
| <b>18-64</b>                                    | 36,835 (51.8)                        | ref                      | -       | 22,081 (52.6)                       | Ref                      |         |
| <b>65-74</b>                                    | 14,122 (19.9)                        | 1.21 (1.16 – 1.27)       | <0.001  | 9,959 (23.7)                        | 1.03 (0.96 – 1.10)       | 0.40    |
| <b>75-84</b>                                    | 13,234 (18.6)                        | 1.31 (1.26 – 1.37)       | <0.001  | 7,933 (18.9)                        | 1.11 (1.04 – 1.20)       | 0.003   |
| <b>≥ 85</b>                                     | 6,872 (9.7)                          | 1.26 (1.19 – 1.33)       | <0.001  | 2,003 (4.8)                         | 1.08 (0.96 – 1.22)       | 0.19    |
| <b>Sex</b>                                      |                                      |                          |         |                                     |                          |         |
| <b>Female</b>                                   | 32,692 (46.0)                        | ref                      |         | 16,391 (39.1)                       | Ref                      |         |
| <b>Male</b>                                     | 38,369 (54.0)                        | NA <sup>‡</sup>          | 0.002   | 25,484 (60.9)                       | 0.90 (0.85 – 0.95)       | <0.001  |
| <b>Household income (quintiles)<sup>†</sup></b> |                                      |                          |         |                                     |                          |         |
| <b>1 (lowest)</b>                               | 21,790 (30.7)                        | ref                      | -       | 9,832 (23.5)                        | Ref                      |         |
| <b>2</b>                                        | 8,884 (12.5)                         | 0.98 (0.93 – 1.04)       | 0.52    | 8,960 (21.4)                        | 0.94 (0.87 – 1.02)       | 0.13    |
| <b>3</b>                                        | 9,089 (12.8)                         | 0.96 (0.91 – 1.01)       | 0.15    | 8,071 (19.3)                        | 0.86 (0.79 – 0.93)       | <0.001  |
| <b>4</b>                                        | 13,889 (19.5)                        | 1.00 (0.95 – 1.04)       | 0.84    | 7,706 (18.4)                        | 0.98 (0.91 – 1.07)       | 0.70    |
| <b>5 (highest)</b>                              | 17,411 (24.5)                        | 0.98 (0.93 – 1.02)       | 0.24    | 7,039 (16.8)                        | NA <sup>‡</sup>          |         |
| <b>Mechanical ventilation</b>                   |                                      |                          |         |                                     |                          |         |
| <b>&lt;96 hours without tracheostomy</b>        | 41,517 (58.5)                        | ref                      |         | 29,977 (71.6)                       | Ref                      |         |
| <b>≥96 hours without tracheostomy</b>           | 19,255 (27.1)                        | 0.97 (0.93 – 1.01)       | 0.12    | 8,000 (19.1)                        | 0.93 (0.87 – 1.00)       | 0.06    |
| <b>With tracheostomy</b>                        | 10,231 (14.4)                        | 1.17 (1.11 – 1.23)       | <0.001  | 3,898 (9.3)                         | 0.88 (0.80 – 0.97)       | 0.01    |
| <b>Dialysis during hospitalization</b>          |                                      |                          |         |                                     |                          |         |
| <b>No</b>                                       | 66,430 (93.5)                        | ref                      | -       | 39,195 (93.6)                       | Ref                      |         |
| <b>Yes</b>                                      | 4,633 (6.5)                          | 1.33 (1.26 – 1.41)       | <0.001  | 2,680 (6.4)                         | 1.14 (1.03 – 1.25)       | 0.01    |
| <b>Charlson comorbidity index</b>               |                                      |                          |         |                                     |                          |         |
| <b>0</b>                                        | 19,754 (27.8)                        | ref                      | -       | 12,170 (29.1)                       | Ref                      |         |
| <b>1-2</b>                                      | 30,414 (42.8)                        | NA <sup>‡</sup>          | <0.001  | 15,669 (37.4)                       | 1.30 (1.20 – 1.40)       | <0.001  |
| <b>≥ 3</b>                                      | 20,895 (29.4)                        | NA <sup>‡</sup>          | <0.001  | 14,036 (33.5)                       | NA <sup>‡</sup>          |         |
| <b>Length of index hospital stay</b>            |                                      |                          |         |                                     |                          |         |
| <b>&lt;7 days</b>                               | 12,735 (17.9)                        | ref                      | -       | 6,048 (14.4)                        | Ref                      | -       |
| <b>7-13 days</b>                                | 19,393 (27.3)                        | 1.29 (1.21 – 1.36)       | <0.001  | 11,972 (28.6)                       | 1.33 (1.19 – 1.48)       | <0.001  |
| <b>14-20 days</b>                               | 12,716 (17.9)                        | 1.48 (1.39 – 1.58)       | <0.001  | 7,640 (18.2)                        | 1.40 (1.25 – 1.57)       | <0.001  |
| <b>≥ 21 days</b>                                | 26,219 (36.9)                        | 1.57 (1.48 – 1.67)       | <0.001  | 16,215 (38.8)                       | 1.51 (1.34 – 1.69)       | <0.001  |

| <b>Discharge destination</b>     |               |                 |        |               |                    |        |
|----------------------------------|---------------|-----------------|--------|---------------|--------------------|--------|
| <b>Home</b>                      | 22,771 (31.8) | Ref             | -      | 20,225 (48.3) | Ref                |        |
| <b>Home with health services</b> | 15,584 (21.8) | NA <sup>‡</sup> | <0.001 | 9,688 (23.1)  | 1.36 (1.27 – 1.45) | <0.001 |
| <b>Other</b>                     | 8,806 (12.3)  | NA <sup>‡</sup> | <0.001 | 11,962 (28.6) | NA <sup>‡</sup>    |        |

\* Results of competing risk regression, accounting for death as a competing risk for rehospitalization.

† Data missing for 267 patients in Ontario

‡ Interactions with time for these variables were significant. Therefore, there is no single hazard ratio that can be reported.

C-statistic for multivariable logistic models with the same candidate predictors in each model: NY 0.64; ON 0.62

**Table E5. Length of initial hospital stay for patients, stratified by patient characteristics**

| Characteristic                                      | Length of Initial Hospital Stay, median (IQR) |                    | P Value |
|-----------------------------------------------------|-----------------------------------------------|--------------------|---------|
|                                                     | New York (n=71,063)                           | Ontario (n=41,875) |         |
| <b>Sex</b>                                          |                                               |                    |         |
| <b>Male</b>                                         |                                               |                    |         |
| <b>Median</b>                                       | 15 (8-29)                                     | 15 (8-29)          |         |
| <b>Mean</b>                                         | 23.4 (31.5)                                   | 26.0 (37.8)        | < 0.001 |
| <b>Female</b>                                       |                                               |                    |         |
| <b>Median</b>                                       | 15 (8-27)                                     | 17 (9-33)          |         |
| <b>Mean</b>                                         | 22.5 (27.9)                                   | 28.9 (41.1)        | < 0.001 |
| <b>Mechanical ventilation</b>                       |                                               |                    |         |
| <b>&lt;96 hours without tracheostomy*</b>           |                                               |                    |         |
| <b>Median</b>                                       | 10 (6-17)                                     | 12 (7-20)          |         |
| <b>Mean</b>                                         | 13.8 (16.0)                                   | 17.3 (22.1)        | < 0.001 |
| <b>≥96 hours without tracheostomy*</b>              |                                               |                    |         |
| <b>Median</b>                                       | 21 (14-32)                                    | 27 (18-44)         |         |
| <b>Mean</b>                                         | 26.5 (23.0)                                   | 37.5 (34.0)        | < 0.001 |
| <b>Any mechanical ventilation with tracheostomy</b> |                                               |                    |         |
| <b>Median</b>                                       | 42 (28-64)                                    | 62 (41-95)         |         |
| <b>Mean</b>                                         | 53.4 (53.7)                                   | 81.5 (80.3)        | < 0.001 |
| <b>Dialysis during hospitalization</b>              |                                               |                    |         |
| <b>No</b>                                           |                                               |                    |         |
| <b>Median</b>                                       | 15 (8-27)                                     | 15 (8-28)          |         |
| <b>Mean</b>                                         | 22.1 (29.0)                                   | 25.4 (36.9)        | < 0.001 |
| <b>Yes - acute</b>                                  |                                               |                    |         |
| <b>Median</b>                                       | 31 (18-53)                                    | 36 (20-66)         |         |
| <b>Mean</b>                                         | 41.7 (43.0)                                   | 53.7 (59.3)        | < 0.001 |
| <b>Yes - ESRD</b>                                   |                                               |                    |         |
| <b>Median</b>                                       | 19 (10-35)                                    | 27 (13-54)         |         |
| <b>Mean</b>                                         | 28.6 (34.2)                                   | 44.0 (53.9)        | < 0.001 |
| <b>Charlson comorbidity index</b>                   |                                               |                    |         |
| <b>0</b>                                            |                                               |                    |         |
| <b>Median</b>                                       | 14 (6-28)                                     | 10 (6-21)          |         |
| <b>Mean</b>                                         | 22.8 (33.3)                                   | 19.1 (30.5)        | < 0.001 |
| <b>1-2</b>                                          |                                               |                    |         |
| <b>Median</b>                                       | 15 (8-28)                                     | 16 (9-29)          |         |
| <b>Mean</b>                                         | 22.6 (30.2)                                   | 26.6 (39.0)        | < 0.001 |

|                                  |             |             |         |
|----------------------------------|-------------|-------------|---------|
| <b>≥ 3</b>                       |             |             |         |
| <b>Median</b>                    | 16 (10-29)  | 21 (12-40)  |         |
| <b>Mean</b>                      | 23.5 (25.8) | 34.7 (44.3) | < 0.001 |
| <b>Discharge destination</b>     |             |             |         |
| <b>Home</b>                      |             |             |         |
| <b>Median</b>                    | 9 (5-16)    | 11 (7-17)   |         |
| <b>Mean</b>                      | 13.9 (20.2) | 14.8 (17.6) | < 0.001 |
| <b>Home with health services</b> |             |             |         |
| <b>Median</b>                    | 16 (9-27)   | 20 (12-33)  |         |
| <b>Mean</b>                      | 22.6 (21.9) | 29.0 (33.5) | < 0.001 |
| <b>Other<sup>†</sup></b>         |             |             |         |
| <b>Median</b>                    | 21 (12-36)  | 31 (16-58)  |         |
| <b>Mean</b>                      | 29.4 (36.4) | 46.6 (57.5) | < 0.001 |

\* Tracheostomy performed at any time during hospitalization

† Other discharge destination in Ontario includes: long term care (3.1%) rehabilitative care (14.3%), complex continuing care (6.0%), acute care (1.2%) facilities and others (4.0%); in NY: skilled nursing facility (34.3%), rehabilitation facility (2.7%), hospice (2.4%), other hospital (3.1%), and others (3.9%).

Figure E1. Survival curve for patients from hospital discharge to 180 days

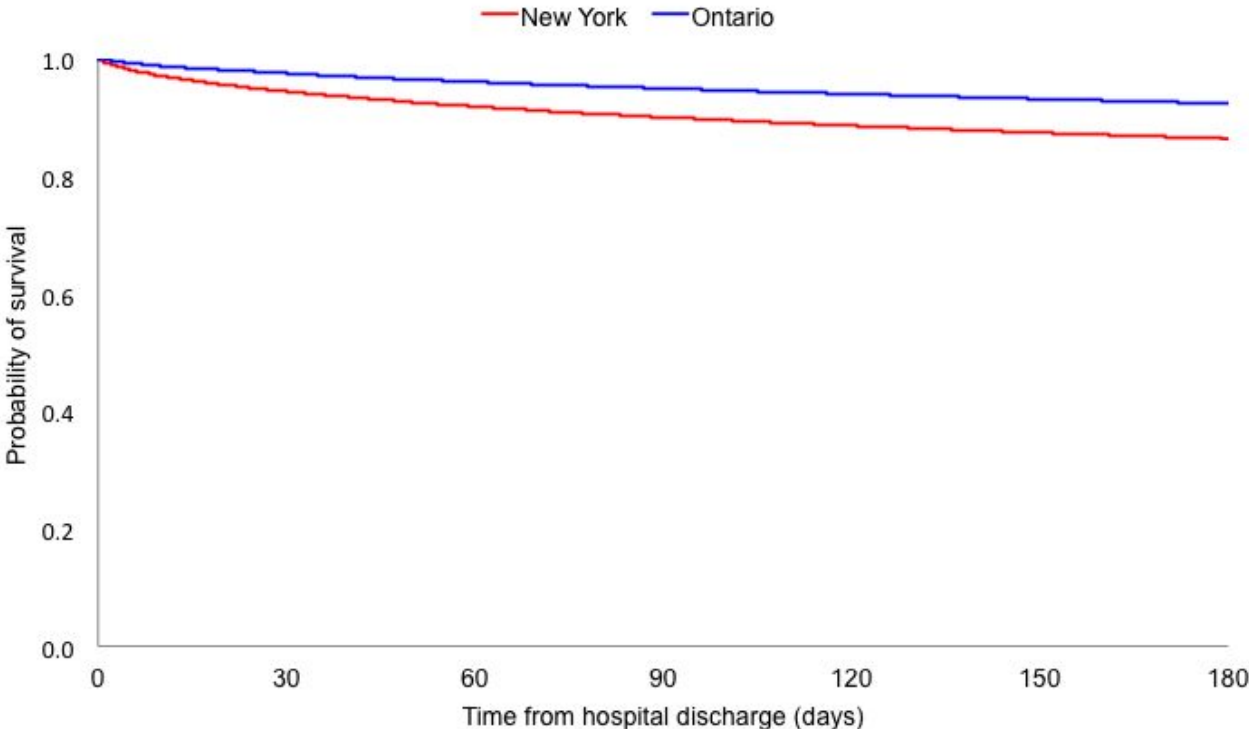

Supplement: AnnalsATS.201806-393OC_wunsch_data_supplement.pdf [file AnnalsATS.201806-393OC_wunsch_data_supplement.pdf]
